# Supplementary material for: The influence of light on the field-induced magnetization dynamics of two Er(iii) coordination polymers with different halogen substituents
Source: Royal Society of Chemistry journal article supplement (doi:10.1039/d3dt02714g), 2023-11-15
Supplement: d3dt02714g1.pdf [file d3dt02714g1.pdf]

Electronic Supplementary Information for

**The influence of light on the field-induced magnetization dynamics  
of two Er(III) coordination polymers with different halogen  
substituents**

Xiaoshuang Gou,<sup>a</sup> Yuewei Wu,<sup>a</sup> Mengmeng Wang,<sup>a</sup> Ning Liu,<sup>a</sup> Wenlong Lan,<sup>a</sup> Yi-Quan  
Zhang,<sup>b</sup> Wei Shi\*<sup>a</sup> and Peng Cheng\*<sup>a</sup>

<sup>a</sup>Department of Chemistry, College of Chemistry, Nankai University, Tianjin 300071, China.

<sup>b</sup>School of Physical Science and Technology, Nanjing Normal University, Nanjing 210023, P. R.  
China.

## Table of Contents

|                                                                                                                    |     |
|--------------------------------------------------------------------------------------------------------------------|-----|
| 1. Structures.....                                                                                                 | S1  |
| 2. PXRD patterns.....                                                                                              | S3  |
| 3. TGA patterns.....                                                                                               | S4  |
| 4. IR spectra.....                                                                                                 | S5  |
| 5. UV-vis spectra.....                                                                                             | S6  |
| 6. EPR spectra.....                                                                                                | S7  |
| 7. Magnetic characterizations.....                                                                                 | S8  |
| 8. Photomagnetic characterizations.....                                                                            | S10 |
| 9. Calculated ligand structures.....                                                                               | S19 |
| 10. XRD data.....                                                                                                  | S20 |
| 11. Symmetries and deviated values.....                                                                            | S21 |
| 12. Relaxation fitting parameters.....                                                                             | S22 |
| 13. The fitting parameters of relaxation processes for <b>1</b> , <b>1a</b> , <b>2</b> and <b>2a</b> .....         | S26 |
| 13. Calculated energy levels of the lowest ten states of H <sub>2</sub> CA and H <sub>2</sub> BA...                | S27 |
| 14. Calculated ADCH charges per atom in the lowest three states of H <sub>2</sub> CA and<br>H <sub>2</sub> BA..... | S28 |

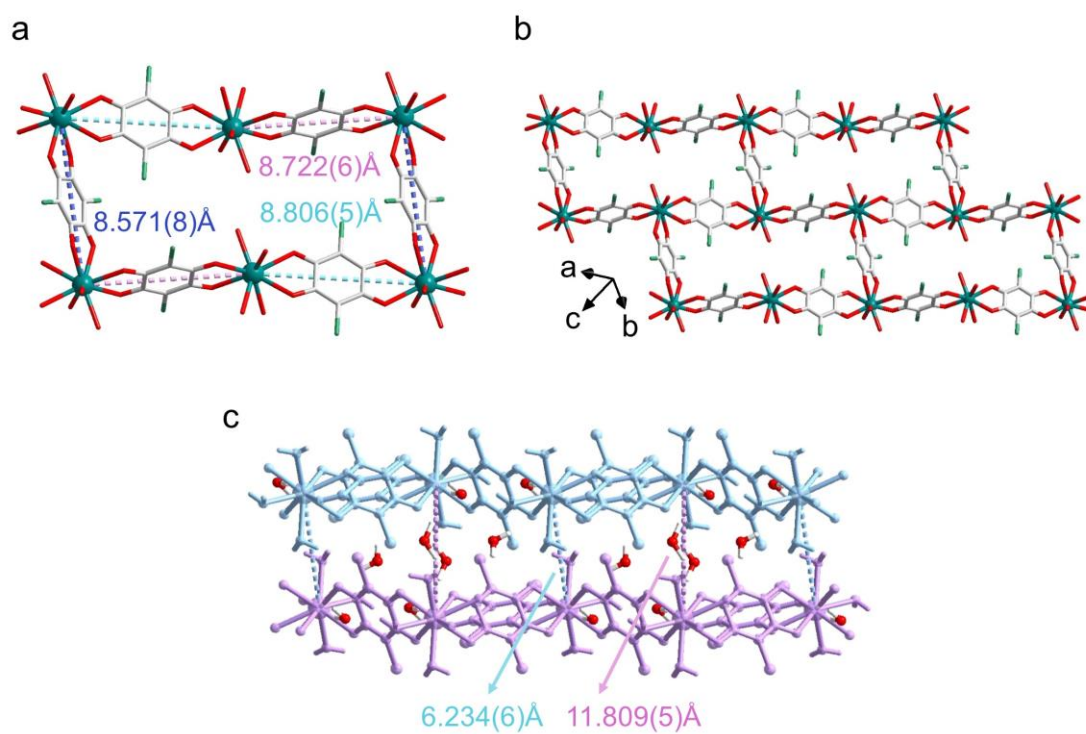

Fig. S1 (a) View of one six-membered ring in **1**. (b) Top view of 2D hexagonal layer in **1**. (c) Side view of the layers in **1**. The closest Er(III) sites in neighboring layers is 6.234(6) Å in **1**. Cyan, red, green and grey spheres represent Er, O, Cl and C atoms, respectively.

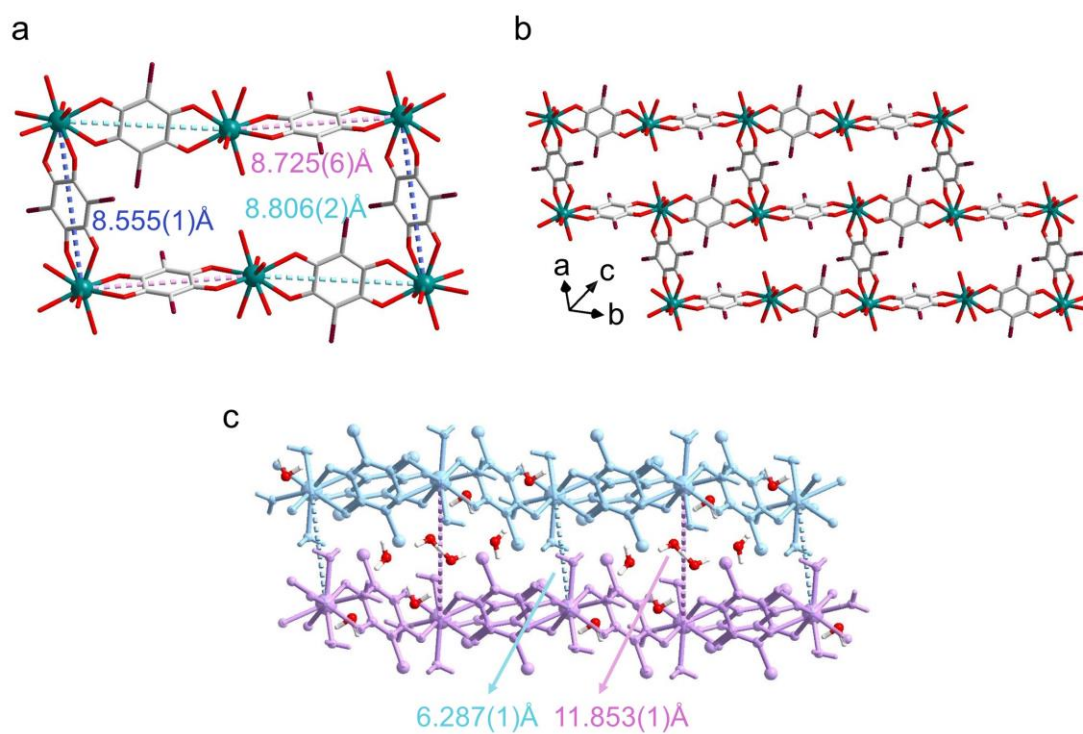

Fig. S2 View of one six-membered ring in **2**. (b) Top view of 2D hexagonal layer in **2**. (c) Side view of the layers in **2**. The closest Er(III) sites in neighboring layers is 6.287(1) Å in **2**. Cyan, red, wine and grey spheres represent Er, O, Br and C atoms, respectively.

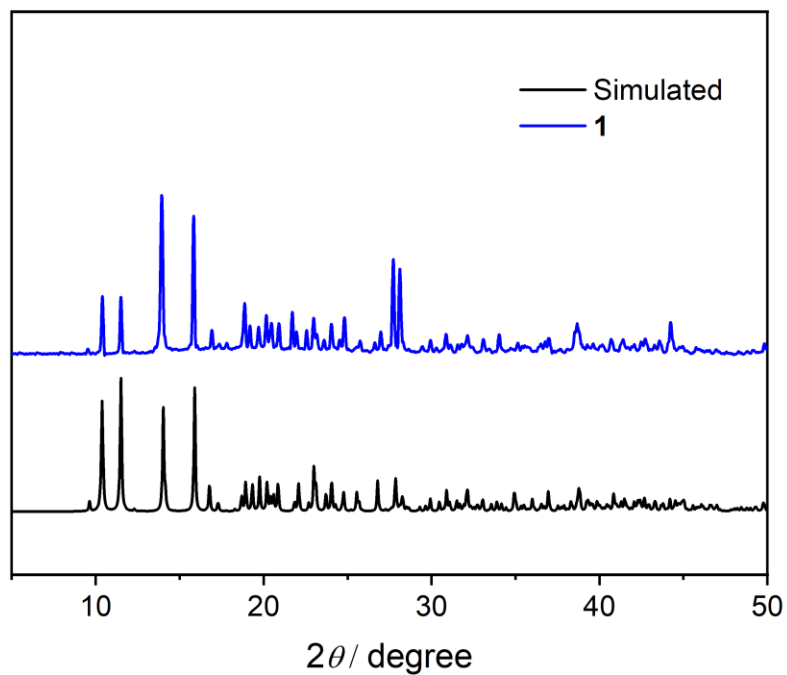

Fig. S3 Experimental and simulated PXR D patterns for 1.

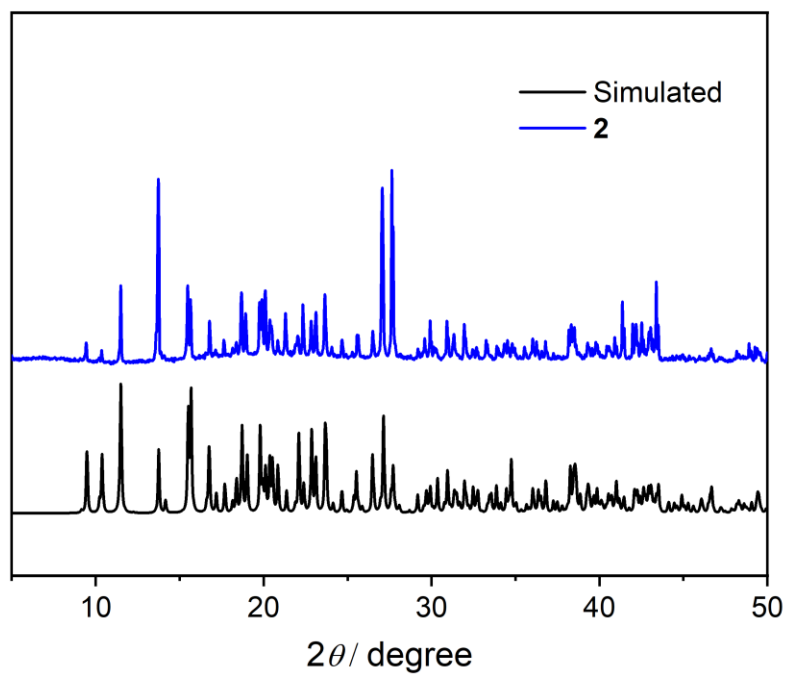

Fig. S4 Experimental and simulated PXR D patterns for 2.

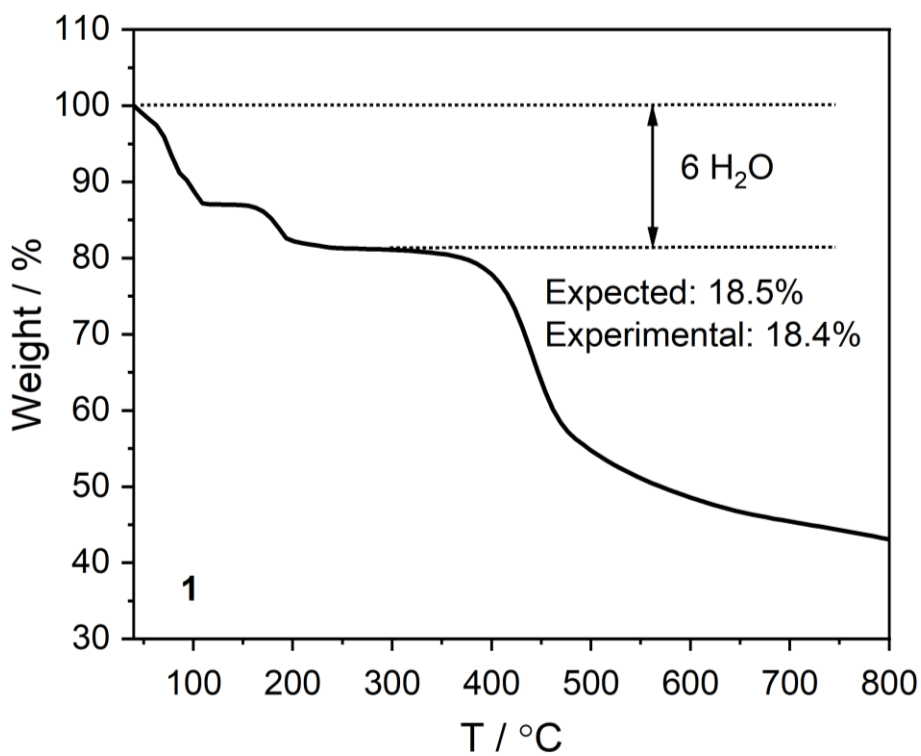

Fig. S5 Thermogravimetric analysis for **1** under N<sub>2</sub> atmosphere (heating rate = 5 °C/min).

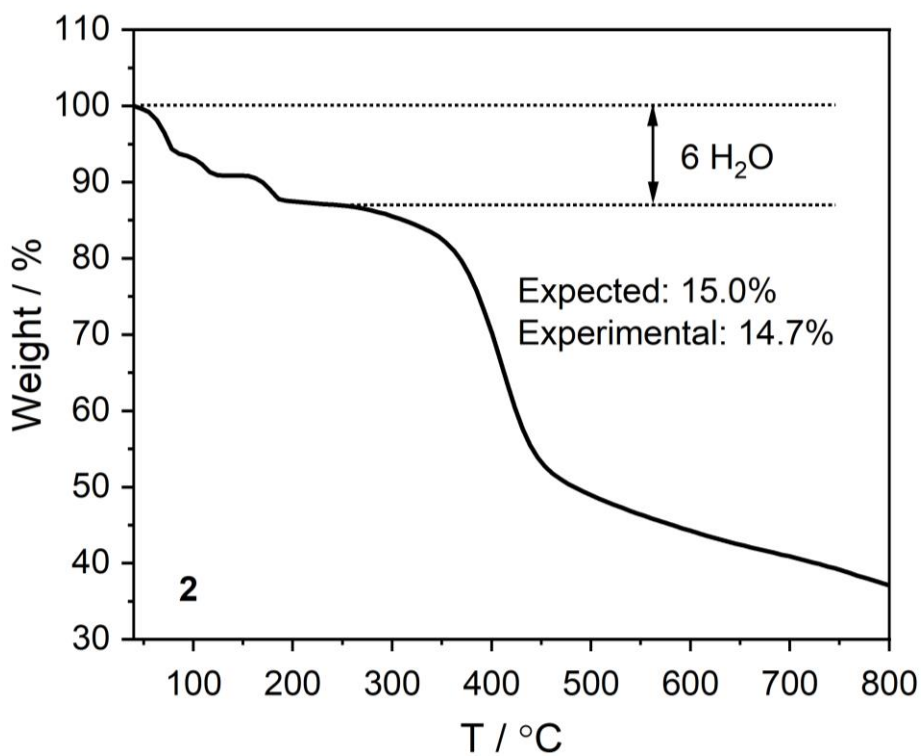

Fig. S6 Thermogravimetric analysis for **2** under N<sub>2</sub> atmosphere (heating rate = 5 °C/min).

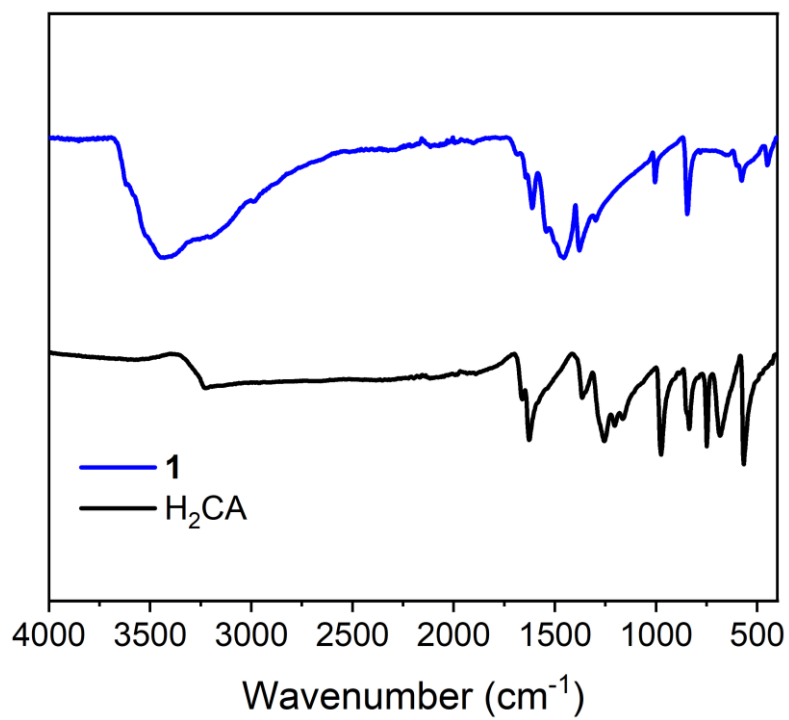

Fig. S7 IR spectra of **1** and H<sub>2</sub>CA.

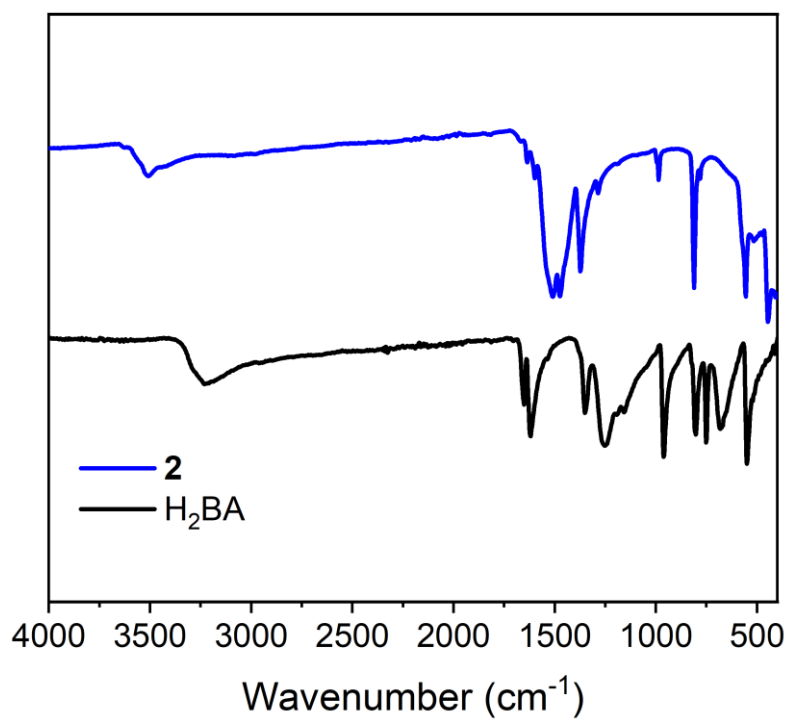

Fig. S8 IR spectra of **2** and H<sub>2</sub>BA.

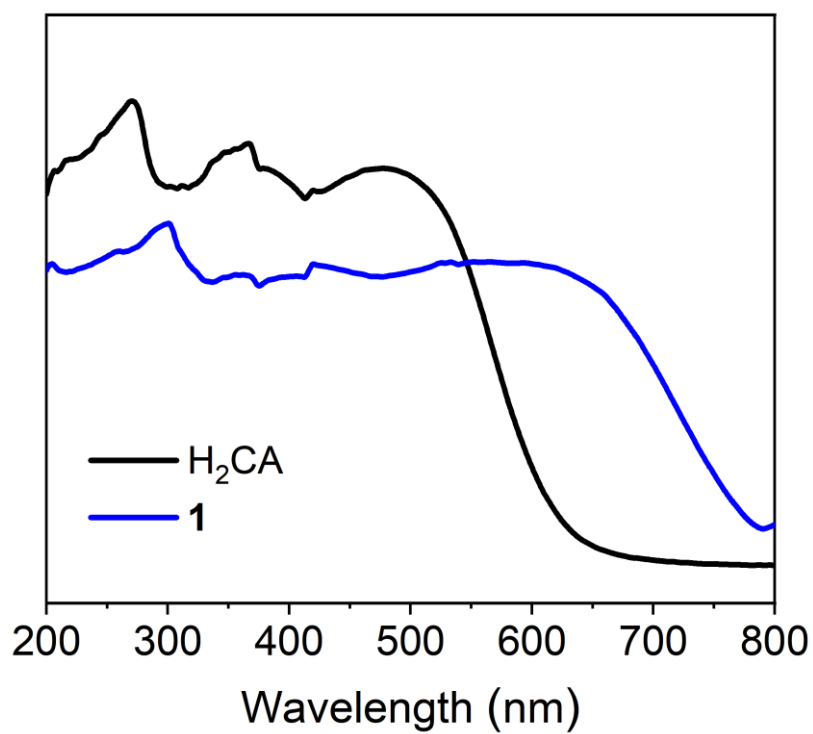

Fig. S9 Uv-vis spectra of **1** and H<sub>2</sub>CA.

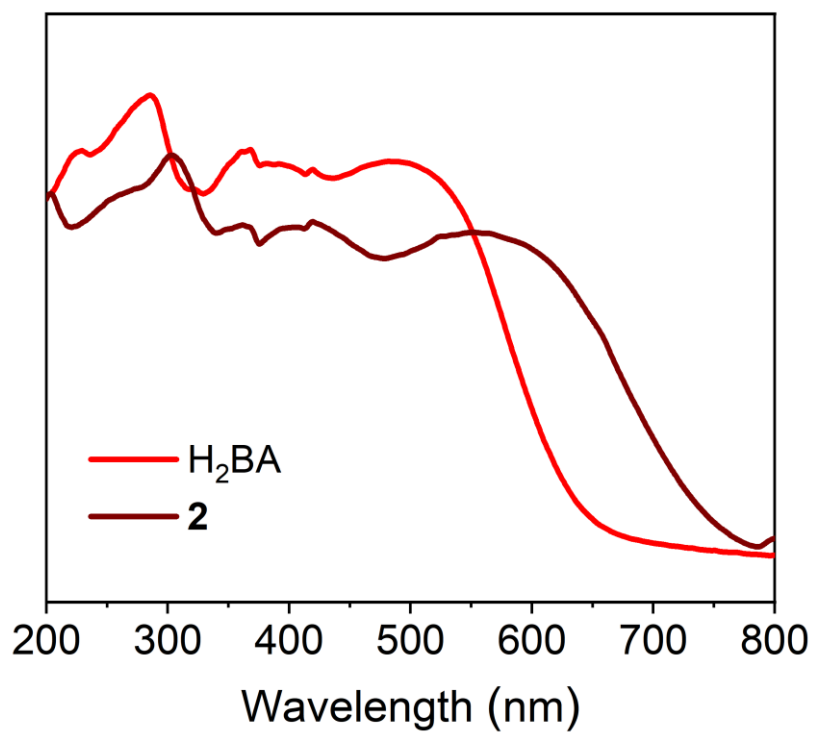

Fig. S10 Uv-vis spectra of **2** and H<sub>2</sub>BA.



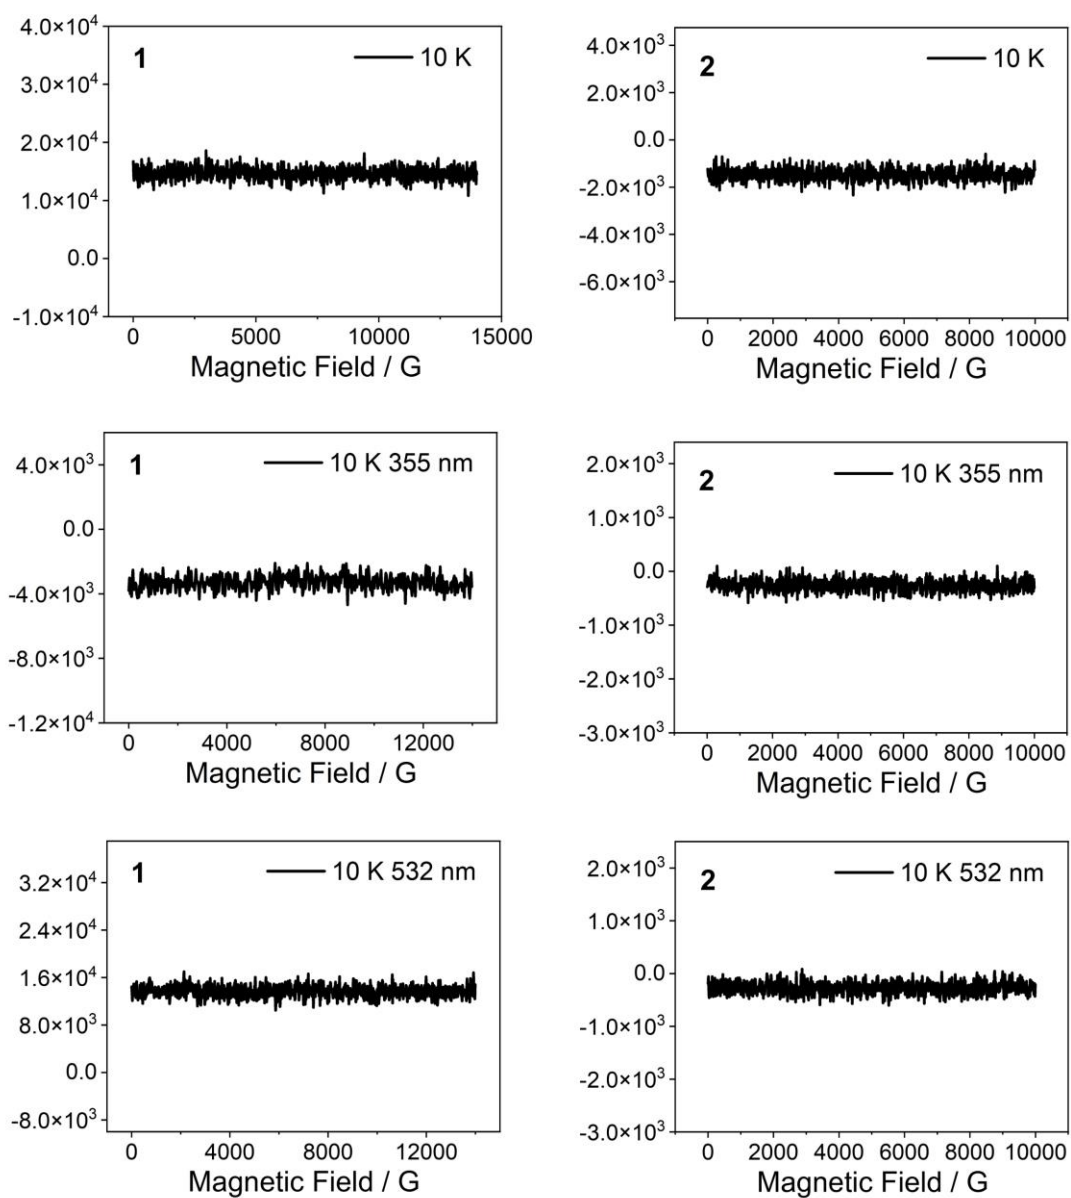

Fig. S11 EPR spectra of **1** and **2**.

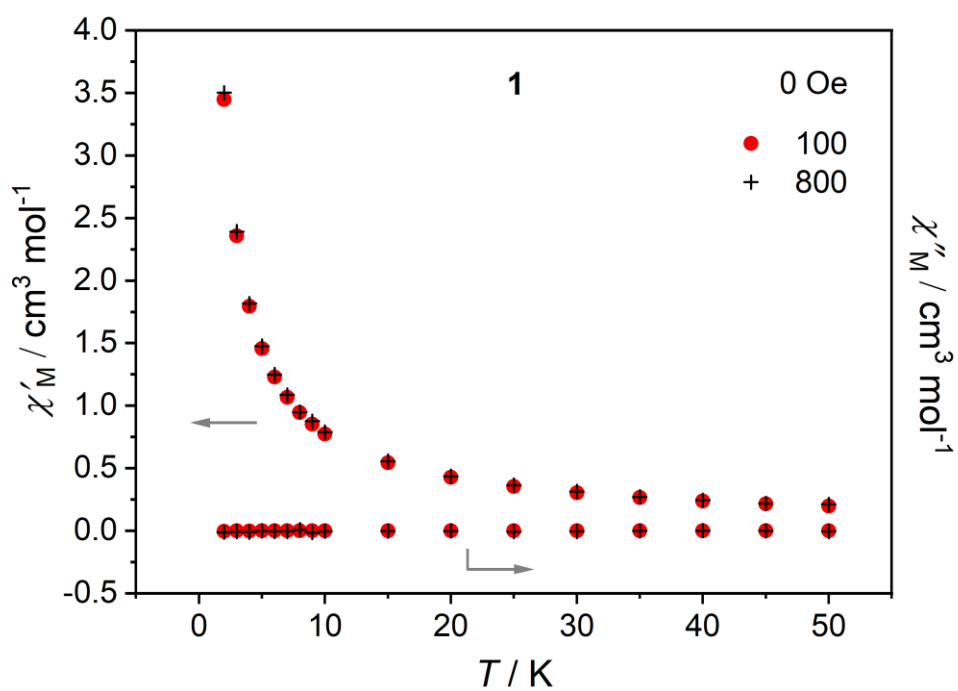

Fig. S12 Temperature dependence of the  $\chi'$  and  $\chi''$  for **1** at zero dc field in the temperature range of 2–50 K,  $\nu = 100, 800$  Hz.

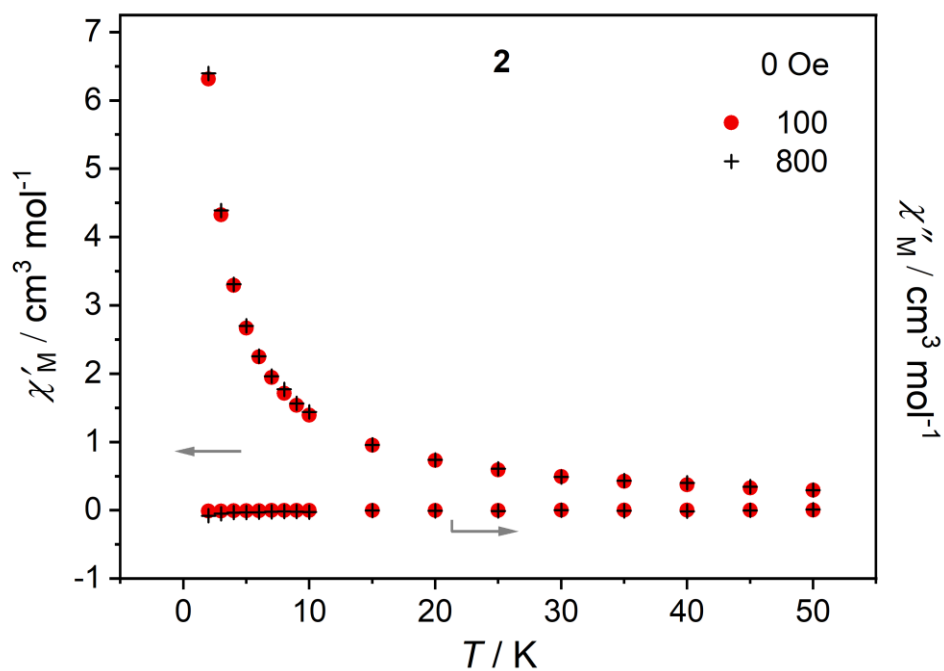

Fig. S13 Temperature dependence of the  $\chi'$  and  $\chi''$  for **2** at zero dc field in the temperature range of 2–50 K,  $\nu = 100, 800$  Hz.

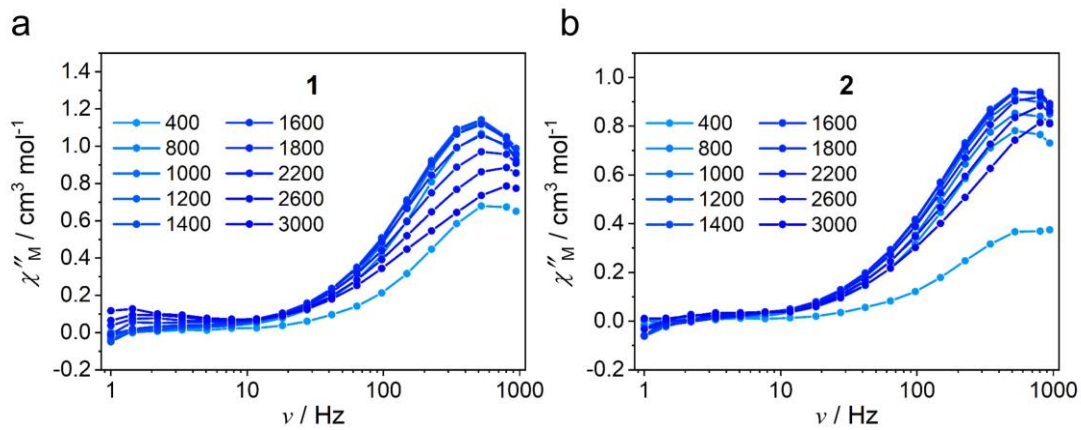

Fig. S14 Frequency dependence of the  $\chi''$  at 2 K in various dc fields for **1** (a) and **2** (b).

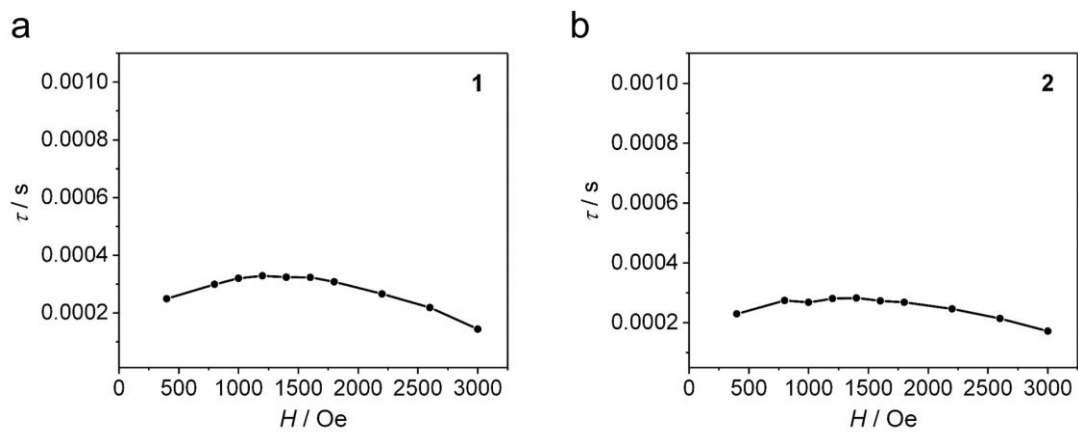

Fig. S15 Field dependence of the magnetic relaxation time ( $\tau$ ) for **1** (a) and **2** (b).

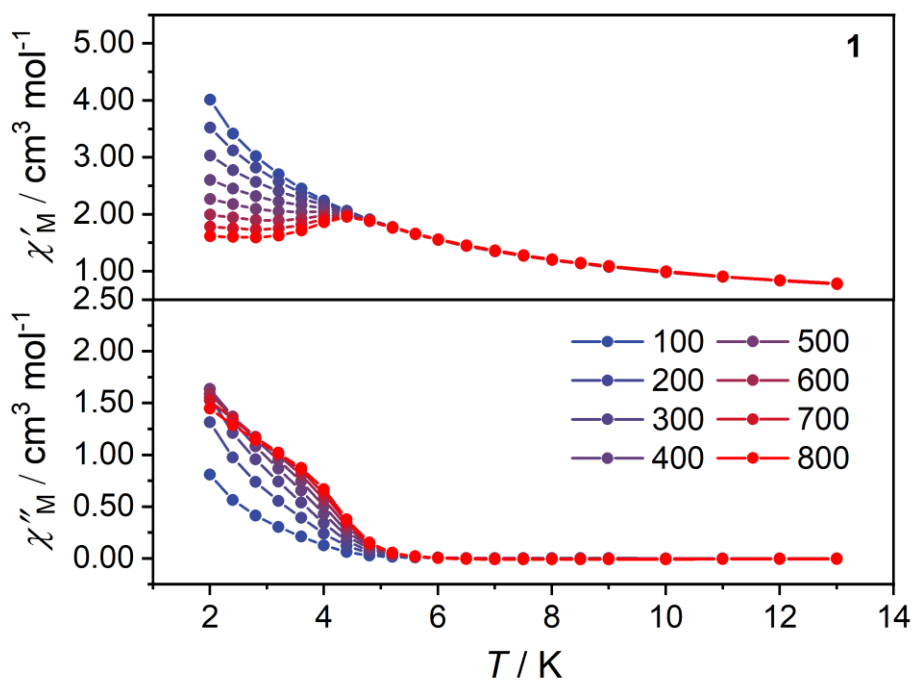

Fig. S16 Temperature dependence of the in-phase  $\chi'$  and out-of-phase  $\chi''$  molar magnetic susceptibility for **1** at 1200 Oe dc field in the temperature range of 2–14 K,  $\nu = 100$ –800 Hz.

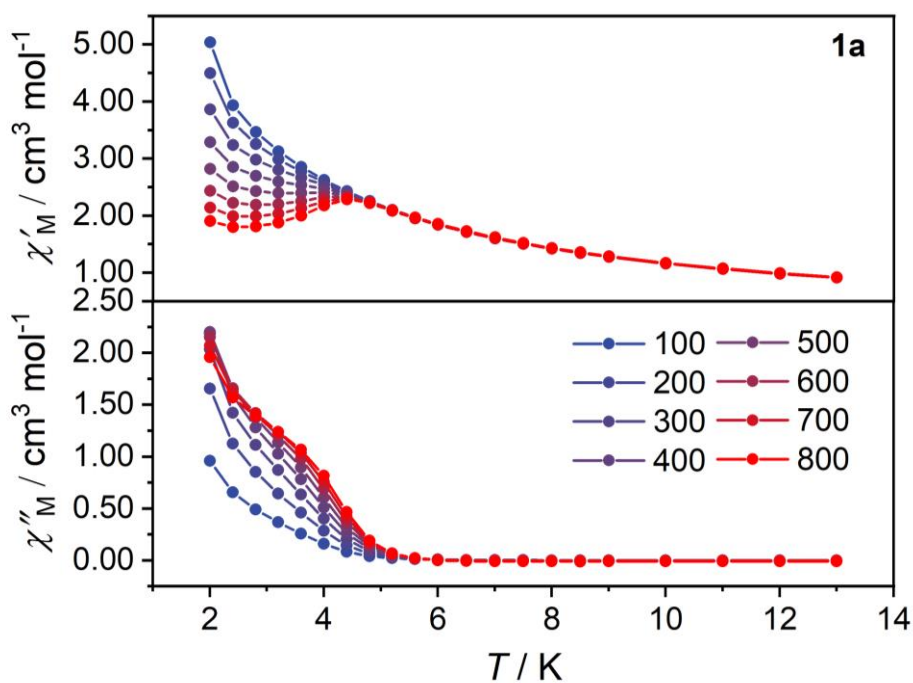

Fig. S17 Temperature dependence of the in-phase  $\chi'$  and out-of-phase  $\chi''$  molar magnetic susceptibility for **1a** at 1200 Oe dc field in the temperature range of 2–14 K,  $\nu = 100$ –800 Hz.

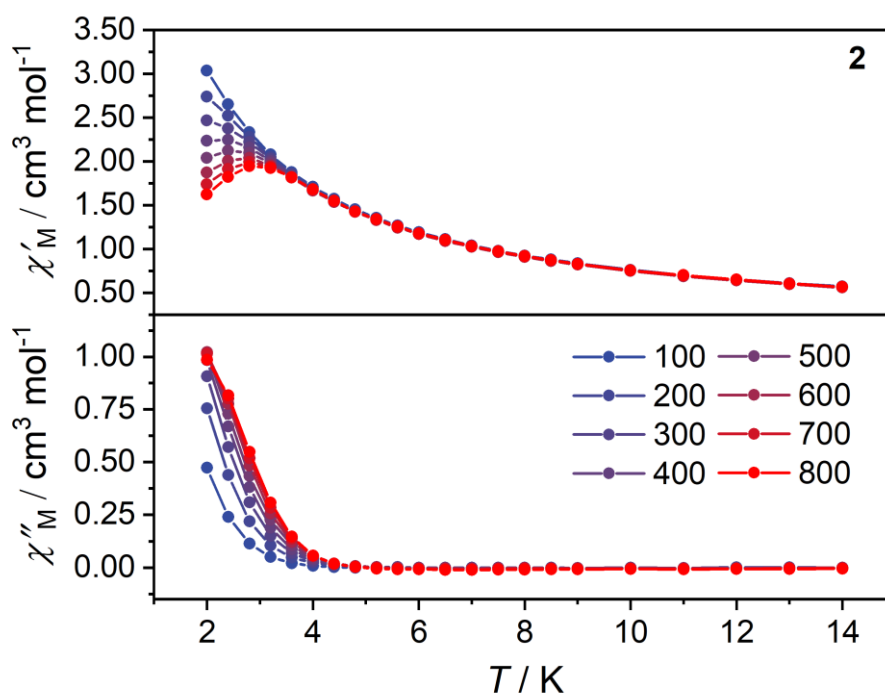

Fig. S18 Temperature dependence of the in-phase  $\chi'$  and out-of-phase  $\chi''$  molar magnetic susceptibility for **2** at 1400 Oe dc field in the temperature range of 2–14 K,  $\nu = 100$ –800 Hz.

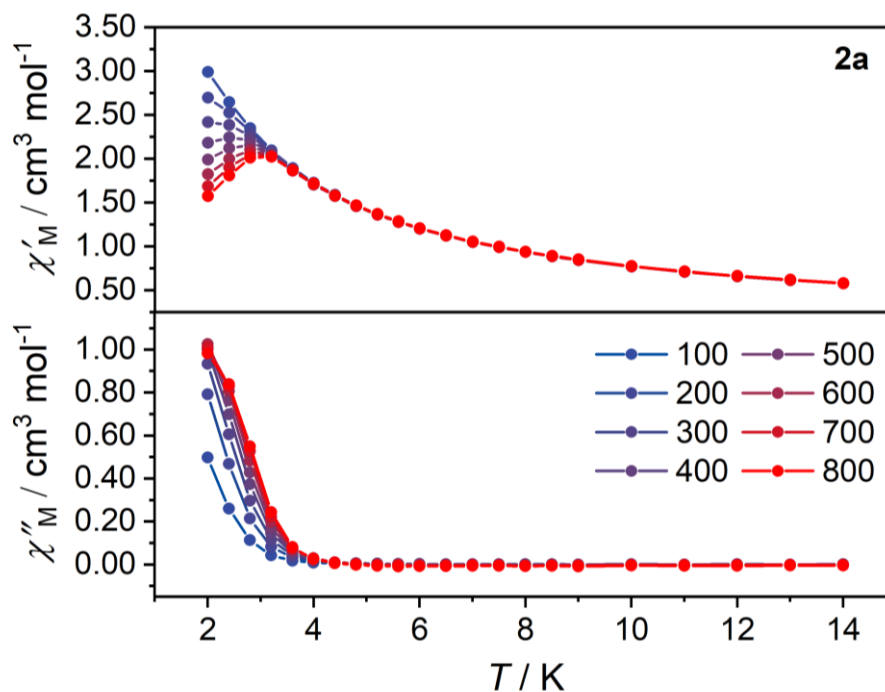

Fig. S19 Temperature dependence of the in-phase  $\chi'$  and out-of-phase  $\chi''$  molar magnetic susceptibility for **2a** at 1400 Oe dc field in the temperature range of 2–14 K,  $\nu = 100$ –800 Hz.

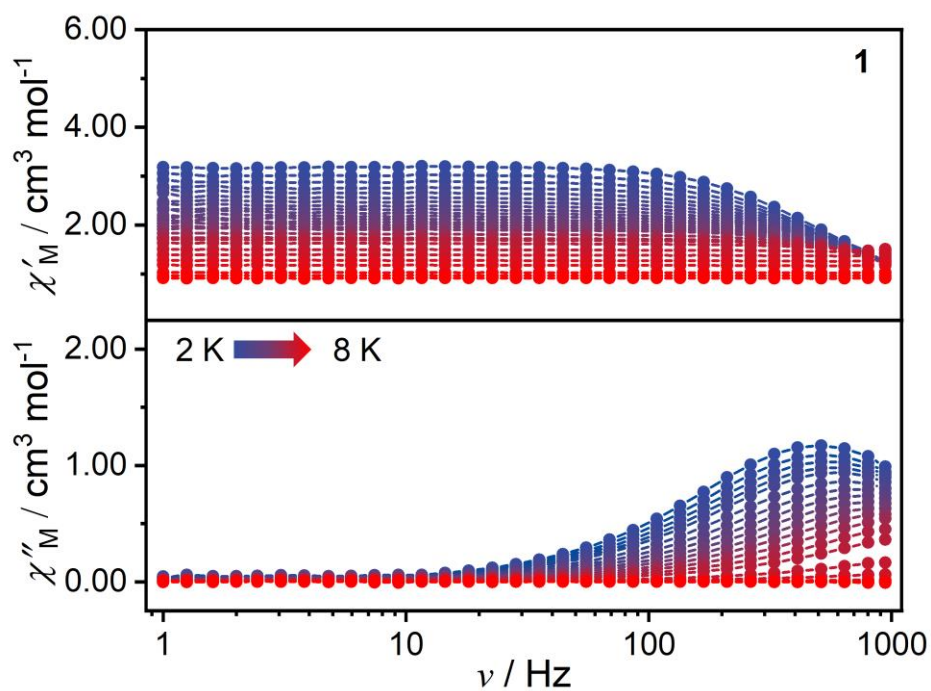

Fig. S20 Frequency dependence of the in-phase  $\chi'$  and out-of-phase  $\chi''$  molar magnetic susceptibility for **1** at 1200 Oe dc field.

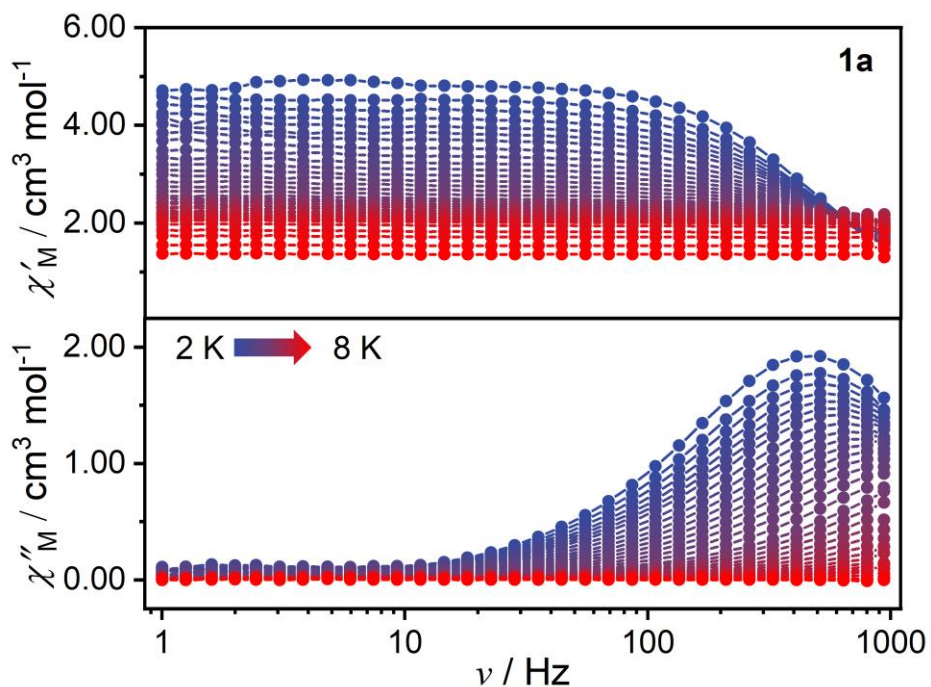

Fig. S21 Frequency dependence of the in-phase  $\chi'$  and out-of-phase  $\chi''$  molar magnetic susceptibility for **1a** at 1200 Oe dc field.

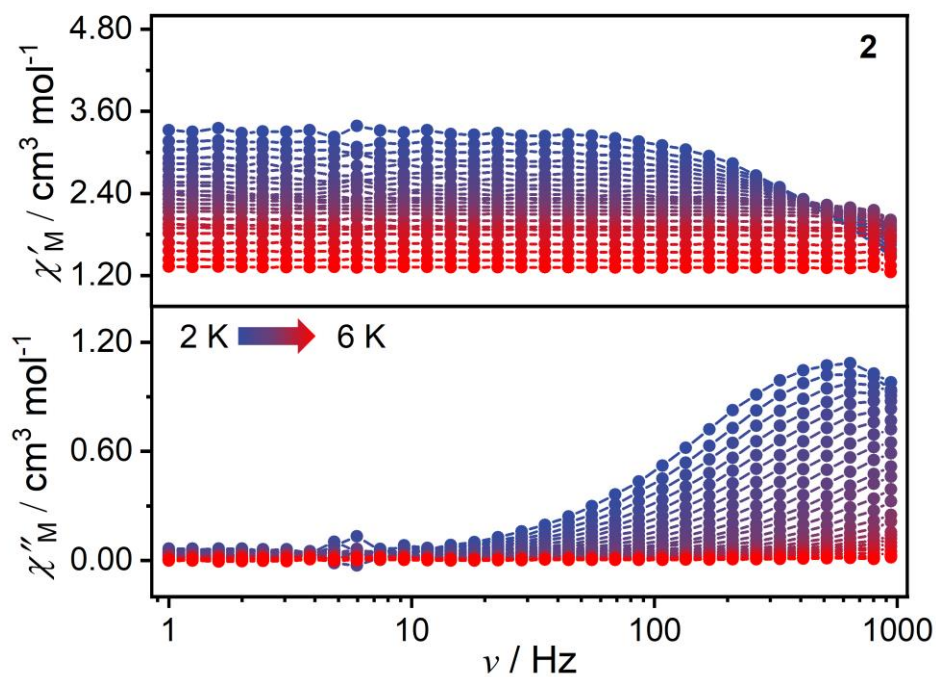

Fig. S22 Frequency dependence of the in-phase  $\chi'$  and out-of-phase  $\chi''$  molar magnetic susceptibility for **2** at 1400 Oe dc field at ac frequencies.

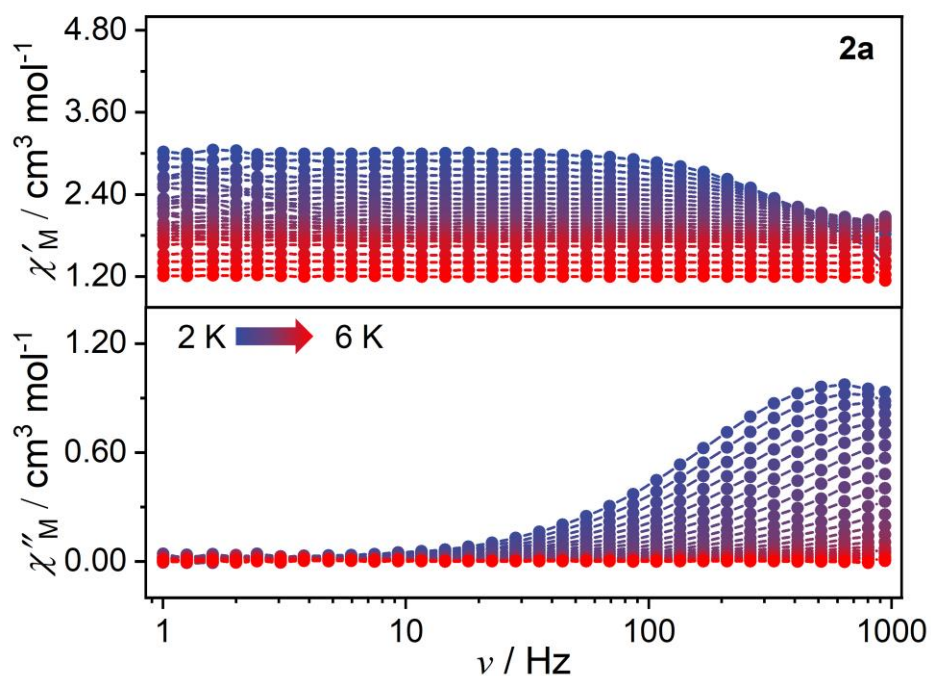

Fig. S23 Frequency dependence of the in-phase  $\chi'$  and out-of-phase  $\chi''$  molar magnetic susceptibility for **2a**, collected in 1400 Oe dc field.



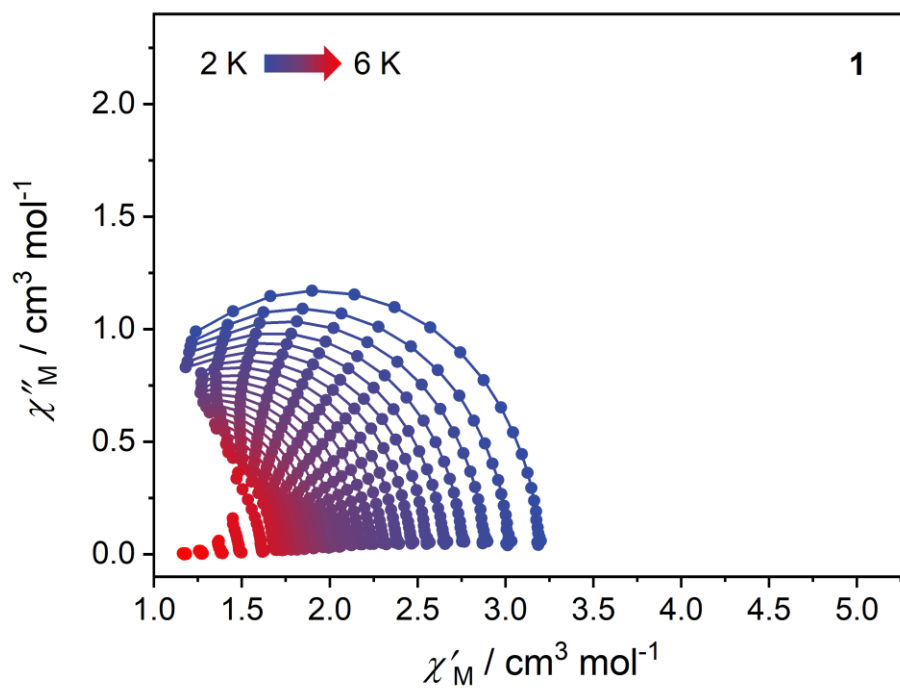

Fig. S24 Cole-Cole plots of **1**.

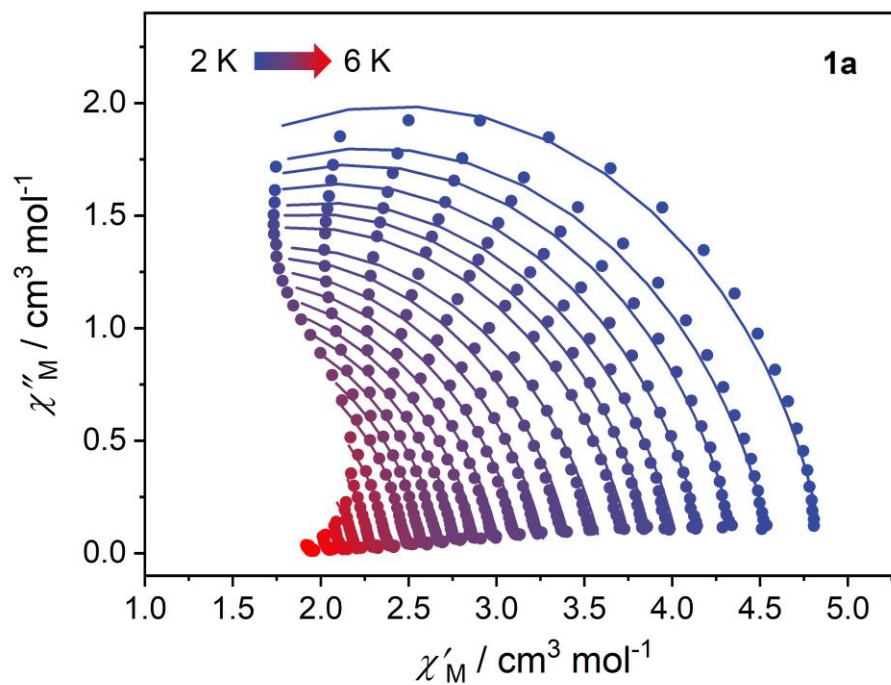

Fig. S25 Cole-Cole plots of **1a**.



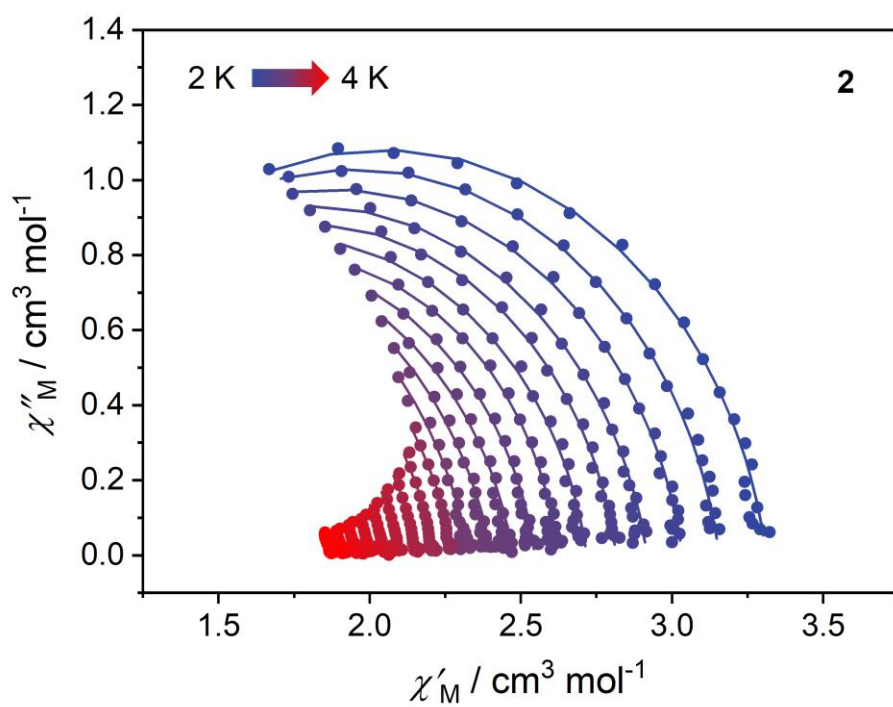

Fig. S26 Cole-Cole plots of **2**.

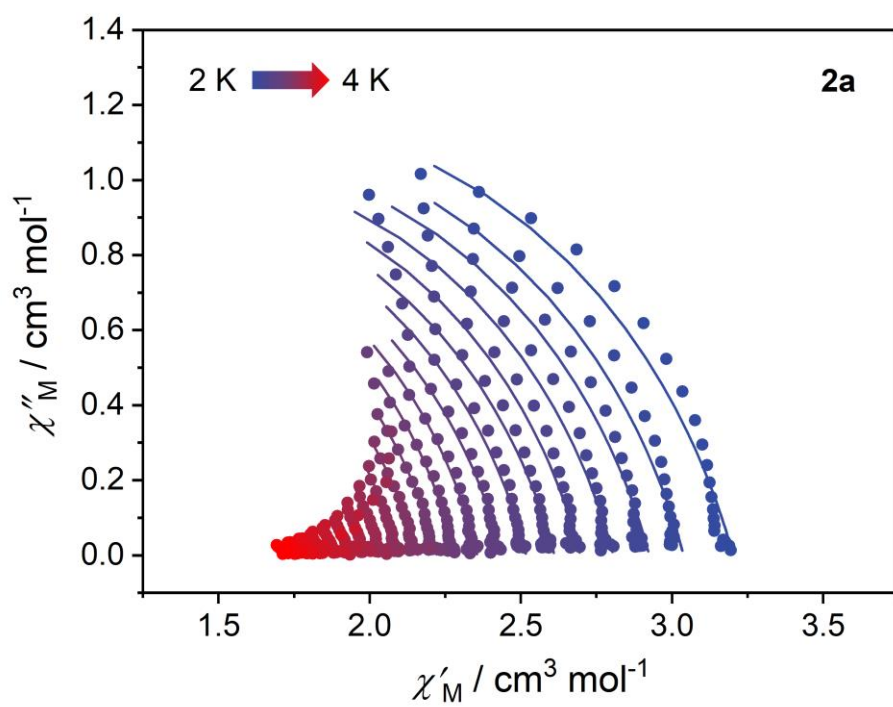

Fig. S27 Cole-cole plots of **2a**.

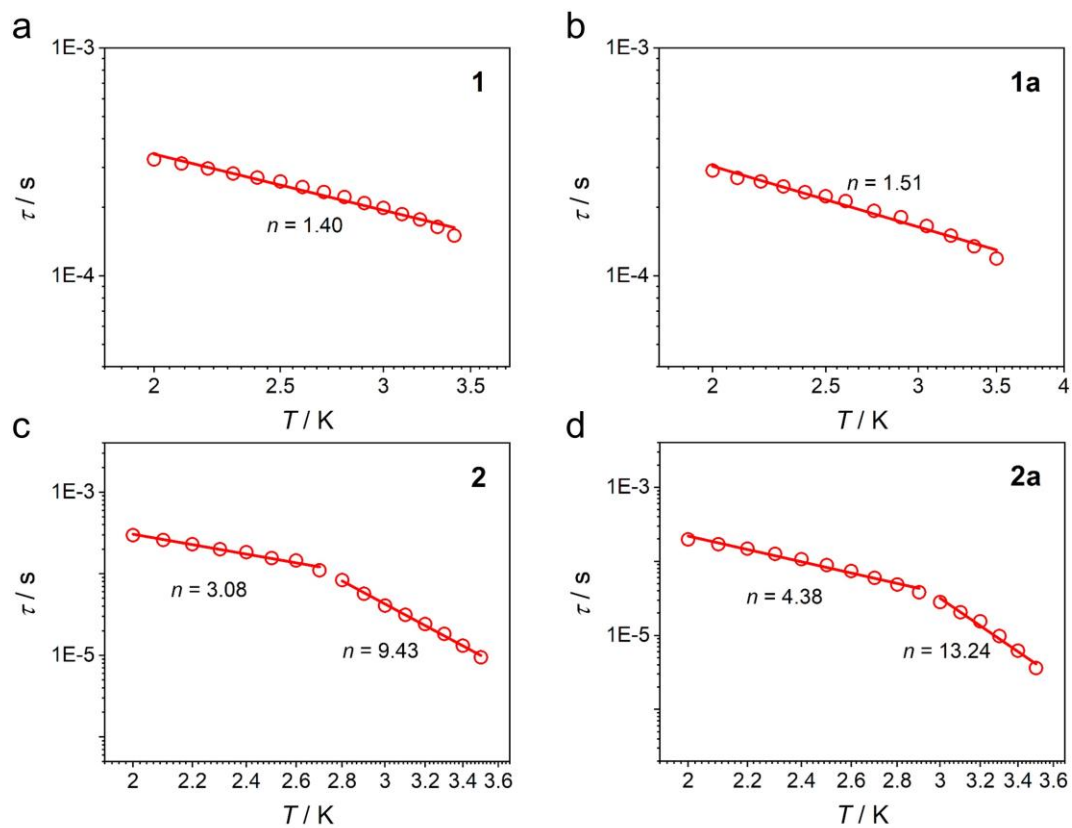

Fig. S28 The plots of the relaxation time  $\tau$  vs  $T$  on a log-log scale for **1**, **1a**, **2** and **2a**.

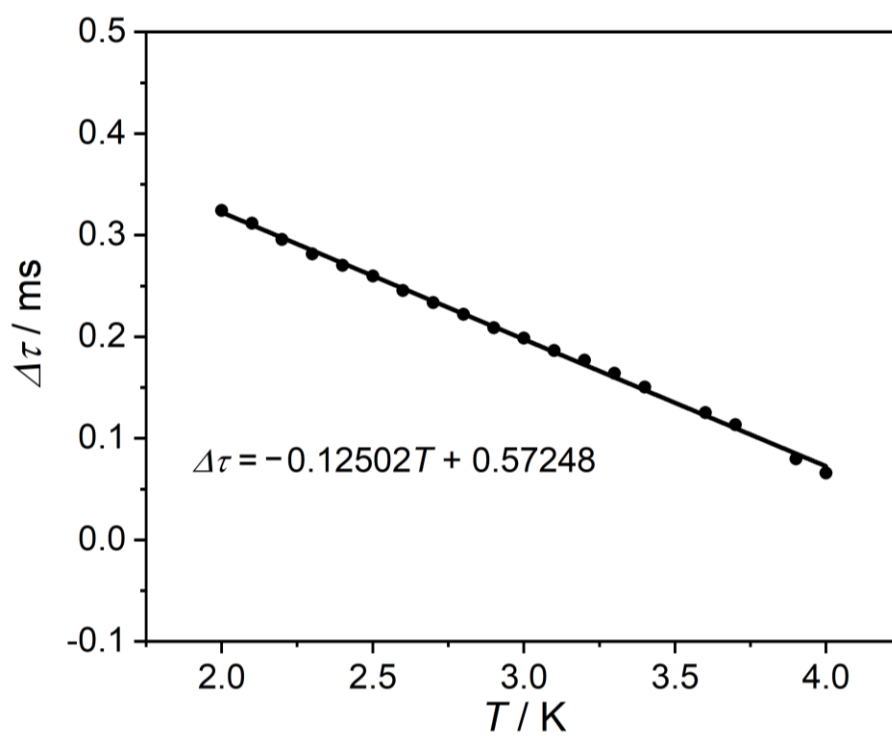

Fig. S29 The plot of the relaxation time difference ( $\Delta\tau$ ) between **1** and **1a**. The straight solid line shows the linear fitting by  $\Delta\tau = -0.12502T + 0.57248$ ,  $R^2 = 0.9983$ .

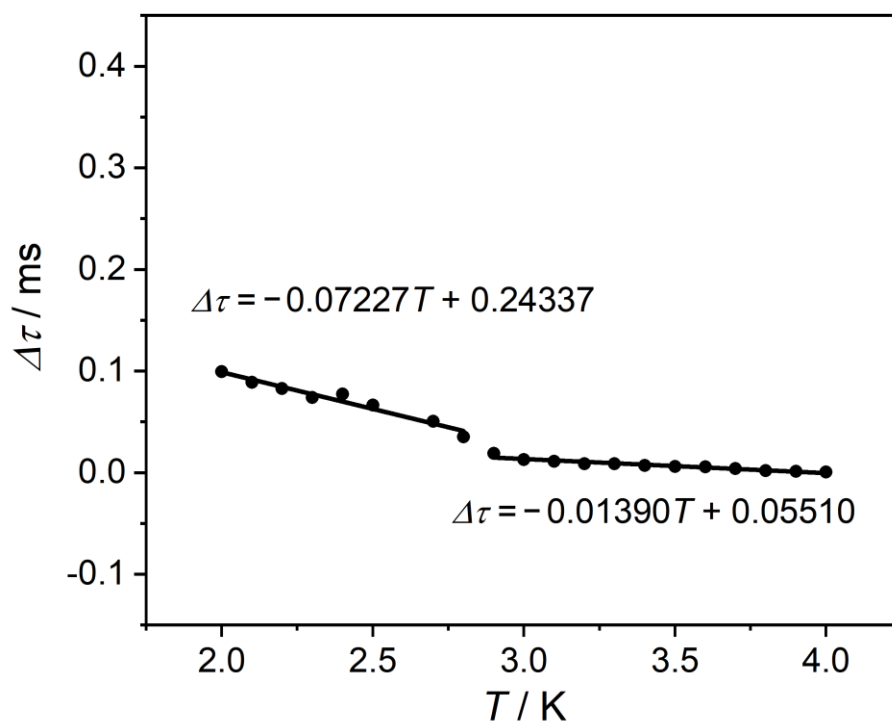

Fig. S30 The plot of the relaxation time difference ( $\Delta\tau$ ) between **2** and **2a**. The straight solid lines show the linear fitting by  $\Delta\tau = -0.07227T + 0.24337$ ,  $R^2 = 0.9577$  (2–2.7 K) and  $\Delta\tau = -0.01390T + 0.05510$ ,  $R^2 = 0.9167$  (2.7–4 K).

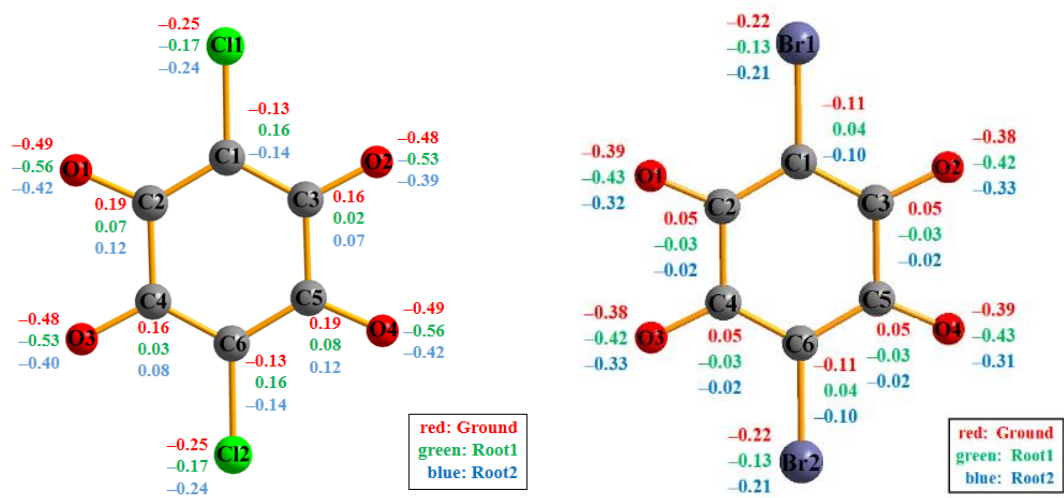

Fig. S31 Calculated ligand structure with charges per atom in the lowest three states.

Table S1. Crystal data and structure refinement details for **1** and **2**.

| <b>Compounds</b>                                                                                      | <b>1</b>                                                         | <b>2</b>                                                         |
|-------------------------------------------------------------------------------------------------------|------------------------------------------------------------------|------------------------------------------------------------------|
| CCDC                                                                                                  | 2161869                                                          | 2161860                                                          |
| Formula                                                                                               | C <sub>9</sub> H <sub>12</sub> Cl <sub>3</sub> ErO <sub>12</sub> | C <sub>9</sub> H <sub>12</sub> Br <sub>3</sub> ErO <sub>12</sub> |
| Formula weight                                                                                        | 585.80                                                           | 719.18                                                           |
| Temperature (K)                                                                                       | 298(2)                                                           | 298(2)                                                           |
| Crystal colour                                                                                        | Black                                                            | Black                                                            |
| Wavelength (Å)                                                                                        | 0.71073                                                          | 0.71073                                                          |
| Crystal system                                                                                        | Triclinic                                                        | Triclinic                                                        |
| Space group                                                                                           | <i>P</i> $\bar{1}$                                               | <i>P</i> $\bar{1}$                                               |
| <i>a</i> (Å)                                                                                          | 9.1911(3)                                                        | 9.1947(3)                                                        |
| <i>b</i> (Å)                                                                                          | 10.1363(3)                                                       | 10.2230(3)                                                       |
| <i>c</i> (Å)                                                                                          | 11.0340(4)                                                       | 11.0842(4)                                                       |
| $\alpha$ (deg)                                                                                        | 64.916(3)                                                        | 65.914(3)                                                        |
| $\beta$ (deg)                                                                                         | 69.776(3)                                                        | 70.234(3)                                                        |
| $\gamma$ (deg)                                                                                        | 81.116(3)                                                        | 80.603(3)                                                        |
| <i>Z</i>                                                                                              | 2                                                                | 2                                                                |
| <i>V</i> (Å <sup>3</sup> )                                                                            | 873.58(6)                                                        | 894.75(6)                                                        |
| $\rho_{\text{calc}}$ (g/cm <sup>3</sup> )                                                             | 2.227                                                            | 2.669                                                            |
| $\mu$ (mm <sup>-1</sup> )                                                                             | 5.319                                                            | 11.445                                                           |
| <i>F</i> (000)                                                                                        | 562.0                                                            | 670.0                                                            |
| <i>R</i> <sub>int</sub>                                                                               | 0.0245                                                           | 0.0441                                                           |
| Goodness-of-fit on <i>F</i> <sup>2</sup>                                                              | 1.077                                                            | 1.039                                                            |
| <sup>a</sup> <i>R</i> <sub>1</sub> , <sup>b</sup> <i>wR</i> <sub>2</sub> ( <i>I</i> ≥ 2σ( <i>I</i> )) | 0.0185, 0.0447                                                   | 0.0293, 0.0520                                                   |
| <sup>a</sup> <i>R</i> <sub>1</sub> , <sup>b</sup> <i>wR</i> <sub>2</sub> (all data)                   | 0.0199, 0.0451                                                   | 0.0429, 0.0546                                                   |

$$^a R_1 = \sum ||F_o| - |F_c|| / \sum |F_o|, \quad ^b wR_2 = \left[ \sum w(|F_o|^2 - |F_c|^2)^2 / \sum w(F_o)^2 \right]^{1/2}$$

Table S2. Symmetries and deviated values of Er(III) centers for **1** and **2**.

| Shape                              | Symmetry | <b>1</b> | <b>2</b> |
|------------------------------------|----------|----------|----------|
| Enneagon                           | $D_{9h}$ | 36.484   | 36.330   |
| Octagonal pyramid                  | $C_{8v}$ | 21.385   | 21.462   |
| Heptagonal bipyramid               | $D_{7h}$ | 19.929   | 20.085   |
| Johnson triangular cupola J3       | $C_{3v}$ | 15.004   | 14.882   |
| Capped cube J8                     | $C_{4v}$ | 10.963   | 10.716   |
| Spherical-relaxed capped cube      | $C_{4v}$ | 9.769    | 9.799    |
| Capped square antiprism J10        | $C_{4v}$ | 1.697    | 1.691    |
| Spherical capped square antiprism  | $C_{4v}$ | 0.671    | 0.694    |
| Tricapped trigonal prism J51       | $D_{3h}$ | 1.869    | 1.858    |
| Spherical tricapped trigonal prism | $D_{3h}$ | 0.555    | 0.561    |
| Tridiminished icosahedron J63      | $C_{3v}$ | 12.105   | 11.977   |
| Hula-hoop                          | $C_{2v}$ | 12.705   | 12.250   |
| Muffin                             | $C_s$    | 1.240    | 1.387    |

Table S3. Relaxation fitting parameters for 1.

| $T$ | $\chi_s$ | $\chi_T$ | $\tau / s$ | $\alpha$ | Residual |
|-----|----------|----------|------------|----------|----------|
| 2   | 0.69352  | 3.1882   | 3.24491E-4 | 0.0343   | 0.00875  |
| 2.1 | 0.66475  | 3.02175  | 3.11815E-4 | 0.04322  | 0.01043  |
| 2.2 | 0.63614  | 2.88659  | 2.95957E-4 | 0.04784  | 0.01358  |
| 2.3 | 0.6102   | 2.76494  | 2.81794E-4 | 0.05282  | 0.01839  |
| 2.4 | 0.59276  | 2.66867  | 2.70312E-4 | 0.06123  | 0.02476  |
| 2.5 | 0.58687  | 2.57041  | 2.60056E-4 | 0.06038  | 0.02628  |
| 2.6 | 0.57969  | 2.4799   | 2.45625E-4 | 0.06544  | 0.01554  |
| 2.7 | 0.56358  | 2.39916  | 2.33562E-4 | 0.06878  | 0.01769  |
| 2.8 | 0.55463  | 2.3223   | 2.22202E-4 | 0.06951  | 0.01305  |
| 2.9 | 0.52819  | 2.26073  | 2.09058E-4 | 0.08121  | 0.02087  |
| 3   | 0.52468  | 2.18857  | 1.9879E-4  | 0.07707  | 0.01376  |
| 3.1 | 0.51579  | 2.12907  | 1.86566E-4 | 0.08272  | 0.01355  |
| 3.2 | 0.50879  | 2.06921  | 1.77015E-4 | 0.0798   | 0.01104  |
| 3.3 | 0.49156  | 2.01594  | 1.64172E-4 | 0.0851   | 0.00894  |
| 3.4 | 0.47458  | 1.95984  | 1.50317E-4 | 0.0865   | 0.00816  |



Table S4. Relaxation fitting parameters for **1a**.

| $T$  | $\chi_S$   | $\chi_T$ | $\tau / s$ | $\alpha$ | Residual |
|------|------------|----------|------------|----------|----------|
| 2    | 2.41482E-8 | 4.86439  | 2.90178E-4 | 0.1281   | 0.27789  |
| 2.1  | 3.26606E-8 | 4.56914  | 2.69493E-4 | 0.15057  | 0.20652  |
| 2.2  | 4.98888E-8 | 4.36936  | 2.59758E-4 | 0.14892  | 0.14668  |
| 2.3  | 7.30158E-8 | 4.187    | 2.47095E-4 | 0.15408  | 0.14354  |
| 2.4  | 1.01261E-7 | 4.04313  | 2.33119E-4 | 0.16453  | 0.15599  |
| 2.5  | 1.53802E-7 | 3.89749  | 2.24013E-4 | 0.16202  | 0.1459   |
| 2.6  | 2.08985E-7 | 3.77456  | 2.13305E-4 | 0.16691  | 0.13251  |
| 2.75 | 3.02983E-7 | 3.60319  | 1.9296E-4  | 0.17814  | 0.14055  |
| 2.9  | 4.29621E-7 | 3.43093  | 1.81248E-4 | 0.16924  | 0.08768  |
| 3.05 | 6.58519E-7 | 3.28367  | 1.65645E-4 | 0.1688   | 0.07039  |
| 3.2  | 9.39617E-7 | 3.15127  | 1.50241E-4 | 0.16877  | 0.05795  |
| 3.35 | 1.2497E-6  | 3.02798  | 1.34924E-4 | 0.16911  | 0.05289  |
| 3.5  | 1.75841E-6 | 2.91249  | 1.19177E-4 | 0.16808  | 0.04982  |

Table S5. Relaxation fitting parameters for **2**.

| $T$ | $\chi_s$    | $\chi_T$ | $\tau / s$ | $\alpha$ | Residual |
|-----|-------------|----------|------------|----------|----------|
| 2   | 0.78042     | 3.31096  | 2.97298E-4 | 0.10007  | 0.03565  |
| 2.1 | 0.74521     | 3.15548  | 2.59106E-4 | 0.10016  | 0.02676  |
| 2.2 | 0.72317     | 3.0344   | 2.30778E-4 | 0.10724  | 0.03738  |
| 2.3 | 0.69317     | 2.91696  | 2.00038E-4 | 0.11294  | 0.03681  |
| 2.4 | 0.75112     | 2.81448  | 1.83857E-4 | 0.09883  | 0.02208  |
| 2.5 | 0.713       | 2.71694  | 1.55463E-4 | 0.10599  | 0.03371  |
| 2.6 | 0.81227     | 2.6213   | 1.45446E-4 | 0.07977  | 0.02327  |
| 2.7 | 0.67136     | 2.546    | 1.10148E-4 | 0.10838  | 0.0244   |
| 2.8 | 0.54897     | 2.47357  | 8.36881E-5 | 0.12465  | 0.0261   |
| 2.9 | 0.29443     | 2.40261  | 5.69546E-5 | 0.14234  | 0.01969  |
| 3   | 0.08821     | 2.32917  | 4.07978E-5 | 0.14172  | 0.02572  |
| 3.1 | 8.08744E-14 | 2.34523  | 3.14507E-5 | 0.15048  | 0.01423  |
| 3.2 | 1.22129E-13 | 2.27996  | 2.41374E-5 | 0.15268  | 0.0119   |
| 3.3 | 1.74125E-13 | 2.22003  | 1.83882E-5 | 0.16065  | 0.00972  |
| 3.4 | 2.64525E-13 | 2.16598  | 1.31743E-5 | 0.18586  | 0.00802  |
| 3.5 | 4.00433E-13 | 2.11171  | 9.45335E-6 | 0.20731  | 0.00889  |

Table S6. Relaxation fitting parameters for **2a**.

| $T$ | $\chi_S$   | $\chi_T$ | $\tau / s$ | $\alpha$ | Residual |
|-----|------------|----------|------------|----------|----------|
| 2   | 7.53477E-6 | 3.20149  | 1.97967E-4 | 0.20565  | 0.10974  |
| 2.1 | 1.03976E-5 | 3.03808  | 1.70466E-4 | 0.20312  | 0.08538  |
| 2.2 | 1.41068E-5 | 2.92456  | 1.47965E-4 | 0.20423  | 0.0602   |
| 2.3 | 2.13861E-5 | 2.80518  | 1.2623E-4  | 0.19904  | 0.04866  |
| 2.4 | 3.27051E-5 | 2.69681  | 1.06613E-4 | 0.19485  | 0.03744  |
| 2.5 | 4.88834E-5 | 2.61078  | 8.907E-5   | 0.19837  | 0.02693  |
| 2.6 | 7.57031E-5 | 2.5177   | 7.39878E-5 | 0.18986  | 0.02524  |
| 2.7 | 1.06454E-4 | 2.43707  | 5.98485E-5 | 0.18924  | 0.01995  |
| 2.8 | 1.63054E-4 | 2.35502  | 4.84814E-5 | 0.17742  | 0.01381  |
| 2.9 | 2.41248E-4 | 2.28005  | 3.81673E-5 | 0.17113  | 0.01163  |
| 3   | 3.50079E-4 | 2.22145  | 2.82269E-5 | 0.18913  | 0.01948  |
| 3.1 | 5.0664E-4  | 2.15829  | 2.04919E-5 | 0.20186  | 0.01773  |
| 3.2 | 7.77148E-4 | 2.09355  | 1.55206E-5 | 0.19567  | 0.00729  |
| 3.3 | 0.00115    | 2.0425   | 9.78397E-6 | 0.24106  | 0.00964  |
| 3.4 | 0.00174    | 1.98874  | 6.2022E-6  | 0.27331  | 0.00563  |
| 3.5 | 0.0025     | 1.93895  | 3.61472E-6 | 0.31206  | 0.00501  |

Table S7. The fitting parameters of relaxation processes for **1**, **1a**, **2** and **2a**.

| Complexes | $A$ ( $\text{s}^{-1} \text{K}^{-n}$ ) | $n$             | $U_{\text{eff}}$ (K) | $\tau_0$ (s)                                         | $R^2$  |
|-----------|---------------------------------------|-----------------|----------------------|------------------------------------------------------|--------|
| <b>1</b>  | $1105 \pm 66$                         | $1.40 \pm 0.06$ |                      |                                                      | 0.9769 |
| <b>1a</b> | $1156 \pm 78$                         | $1.51 \pm 0.07$ |                      |                                                      | 0.9782 |
| <b>2</b>  | $1141 \pm 39$                         | $1.61 \pm 0.45$ | $37.73 \pm 2.11$     | $2.18 \times 10^{-10} \pm$<br>$1.35 \times 10^{-11}$ | 0.9981 |
| <b>2a</b> | $417 \pm 6$                           | $3.56 \pm 0.16$ | $56.52 \pm 0.14$     | $4.66 \times 10^{-13} \pm$<br>$2.78 \times 10^{-14}$ | 0.9984 |

Table S8. Calculated energy levels (eV) of the lowest ten states of H<sub>2</sub>CA and H<sub>2</sub>BA, where Root\* represent the different excited states.

| Excited states | Energy levels     |                   |
|----------------|-------------------|-------------------|
|                | H <sub>2</sub> CA | H <sub>2</sub> BA |
| Ground         | 0.00              | 0.00              |
| Root1          | 2.83              | 2.97              |
| Root2          | 3.02              | 3.08              |
| Root3          | 3.44              | 3.51              |
| Root4          | 3.47              | 3.57              |
| Root5          | 4.07              | 4.15              |
| Root6          | 4.16              | 4.24              |
| Root7          | 5.18              | 4.35              |
| Root8          | 5.24              | 4.49              |
| Root9          | 5.87              | 5.31              |

Table S9. Calculated ADCH charges (e) per atom in the lowest three states of H<sub>2</sub>CA and H<sub>2</sub>BA, where Ground, Root1 and Root2 represent the ground, first and second excited states, respectively.

|         | Ground      | Root1       | Root2       |
|---------|-------------|-------------|-------------|
| C1      | -0.13/-0.11 | 0.16/0.04   | -0.14/-0.10 |
| C2      | 0.19/0.05   | 0.07/-0.03  | 0.12/-0.02  |
| C3      | 0.16/0.05   | 0.02/-0.03  | 0.07/-0.02  |
| C4      | 0.16/0.05   | 0.03/-0.03  | 0.08/-0.02  |
| C5      | 0.19/0.05   | 0.08/-0.03  | 0.12/-0.02  |
| C6      | -0.13/-0.11 | 0.16/0.04   | -0.14/-0.10 |
| O1      | -0.49/-0.39 | -0.56/-0.43 | -0.42/-0.32 |
| O2      | -0.48/-0.38 | -0.53/-0.42 | -0.39/-0.33 |
| O3      | -0.48/-0.38 | -0.53/-0.42 | -0.40/-0.33 |
| O4      | -0.49/-0.39 | -0.56/-0.43 | -0.42/-0.31 |
| Cl1/Br1 | -0.25/-0.22 | -0.17/-0.13 | -0.24/-0.21 |
| Cl2/Br2 | -0.25/-0.22 | -0.17/-0.13 | -0.24/-0.21 |
